# Supplementary material for: Synergistic effects of core@double-shell structured magnesium hydroxide microcapsules on flame retardancy and smoke suppression in flexible poly(vinyl chloride)
Source: Royal Society of Chemistry journal article supplement (doi:10.1039/d1ra09030e), 2022-01-01
Supplement: d1ra09030e1.pdf [file d1ra09030e1.pdf]

Electronic Supplementary Material (ESI) for RSC Advances.

This journal is © The Royal Society of Chemistry 2022

### *Supporting Material for*

## **Synergistic effects of core@double-shell structured magnesium hydroxide microcapsules on flame retardancy and smoke suppression in flexible poly(vinyl chloride)**

Jingshui Xu, Haiying Yang, Zibo Luo, Dang Wu, Gengyu Cao\*

In this work, we have prepared core@double-shell structured MH@DOPO@MF flame retardant and main investigate its flame retardancy and smoke suppression effects in flexible PVC. The chemical structure and morphologies of the as-prepared MH@DOPO@MF was characterized by FTIR and SEM, the results was shown in Fig.1 and Fig.2 (**Supporting Material**).

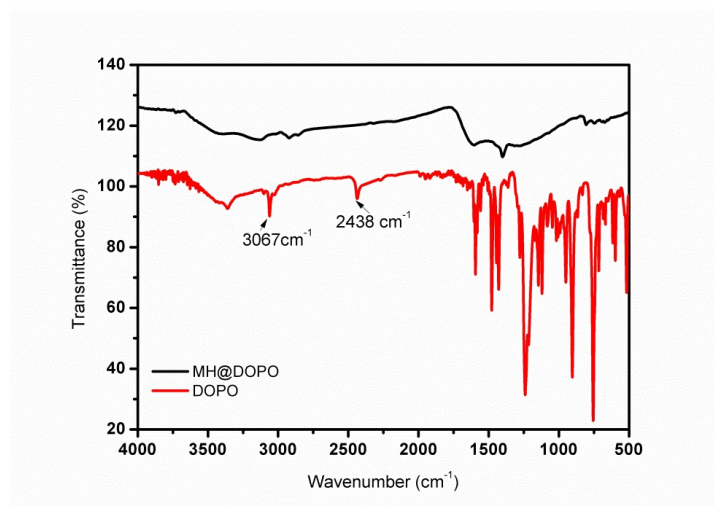

**Fig.1** FTIR spectra of MH@DOPO and DOPO

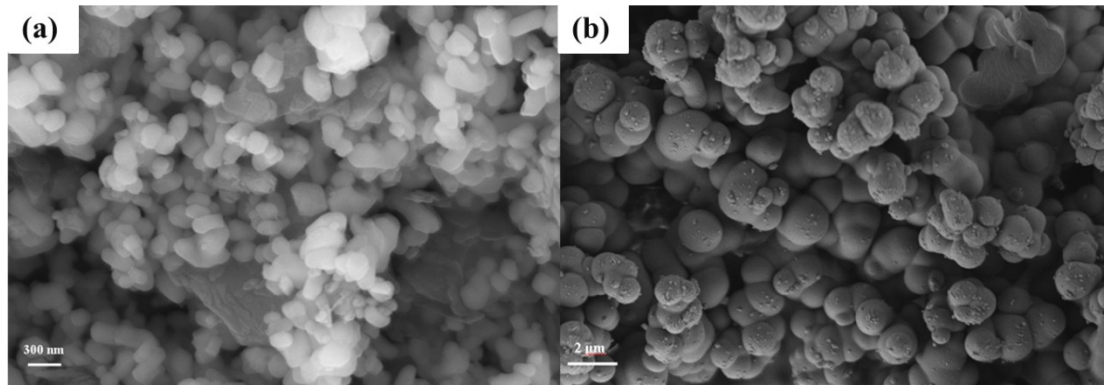

**Fig.2** SEM images of (a)  $\text{Mg}(\text{OH})_2$  and (b)  $\text{MH@DOPO@MF}$

As shown Fig.1, the FTIR spectrum of DOPO, transmittance band at  $3067\text{ cm}^{-1}$  represents the C-H stretching vibration for benzene ring and the typical band at  $2438\text{ cm}^{-1}$  is representative of P-H. For the FTIR spectrum of  $\text{MH@DOPO}$ , the typical band of DOPO at  $2438\text{ cm}^{-1}$  disappeared. In Fig.2, the morphology of MH is nanoscale laminate structure, the morphology of  $\text{MH@DOPO@MF}$  is sphere and lamellar particles are not observed. Obtained results indicated that MH was encapsuled in resins.
